# Supplementary material
Source: Research Square preprint supplement (doi:10.21203/rs.3.rs-9448122/v1)
Supplement: Supplementary file 1 [file e6cae4eca924a7628ab38082.docx]

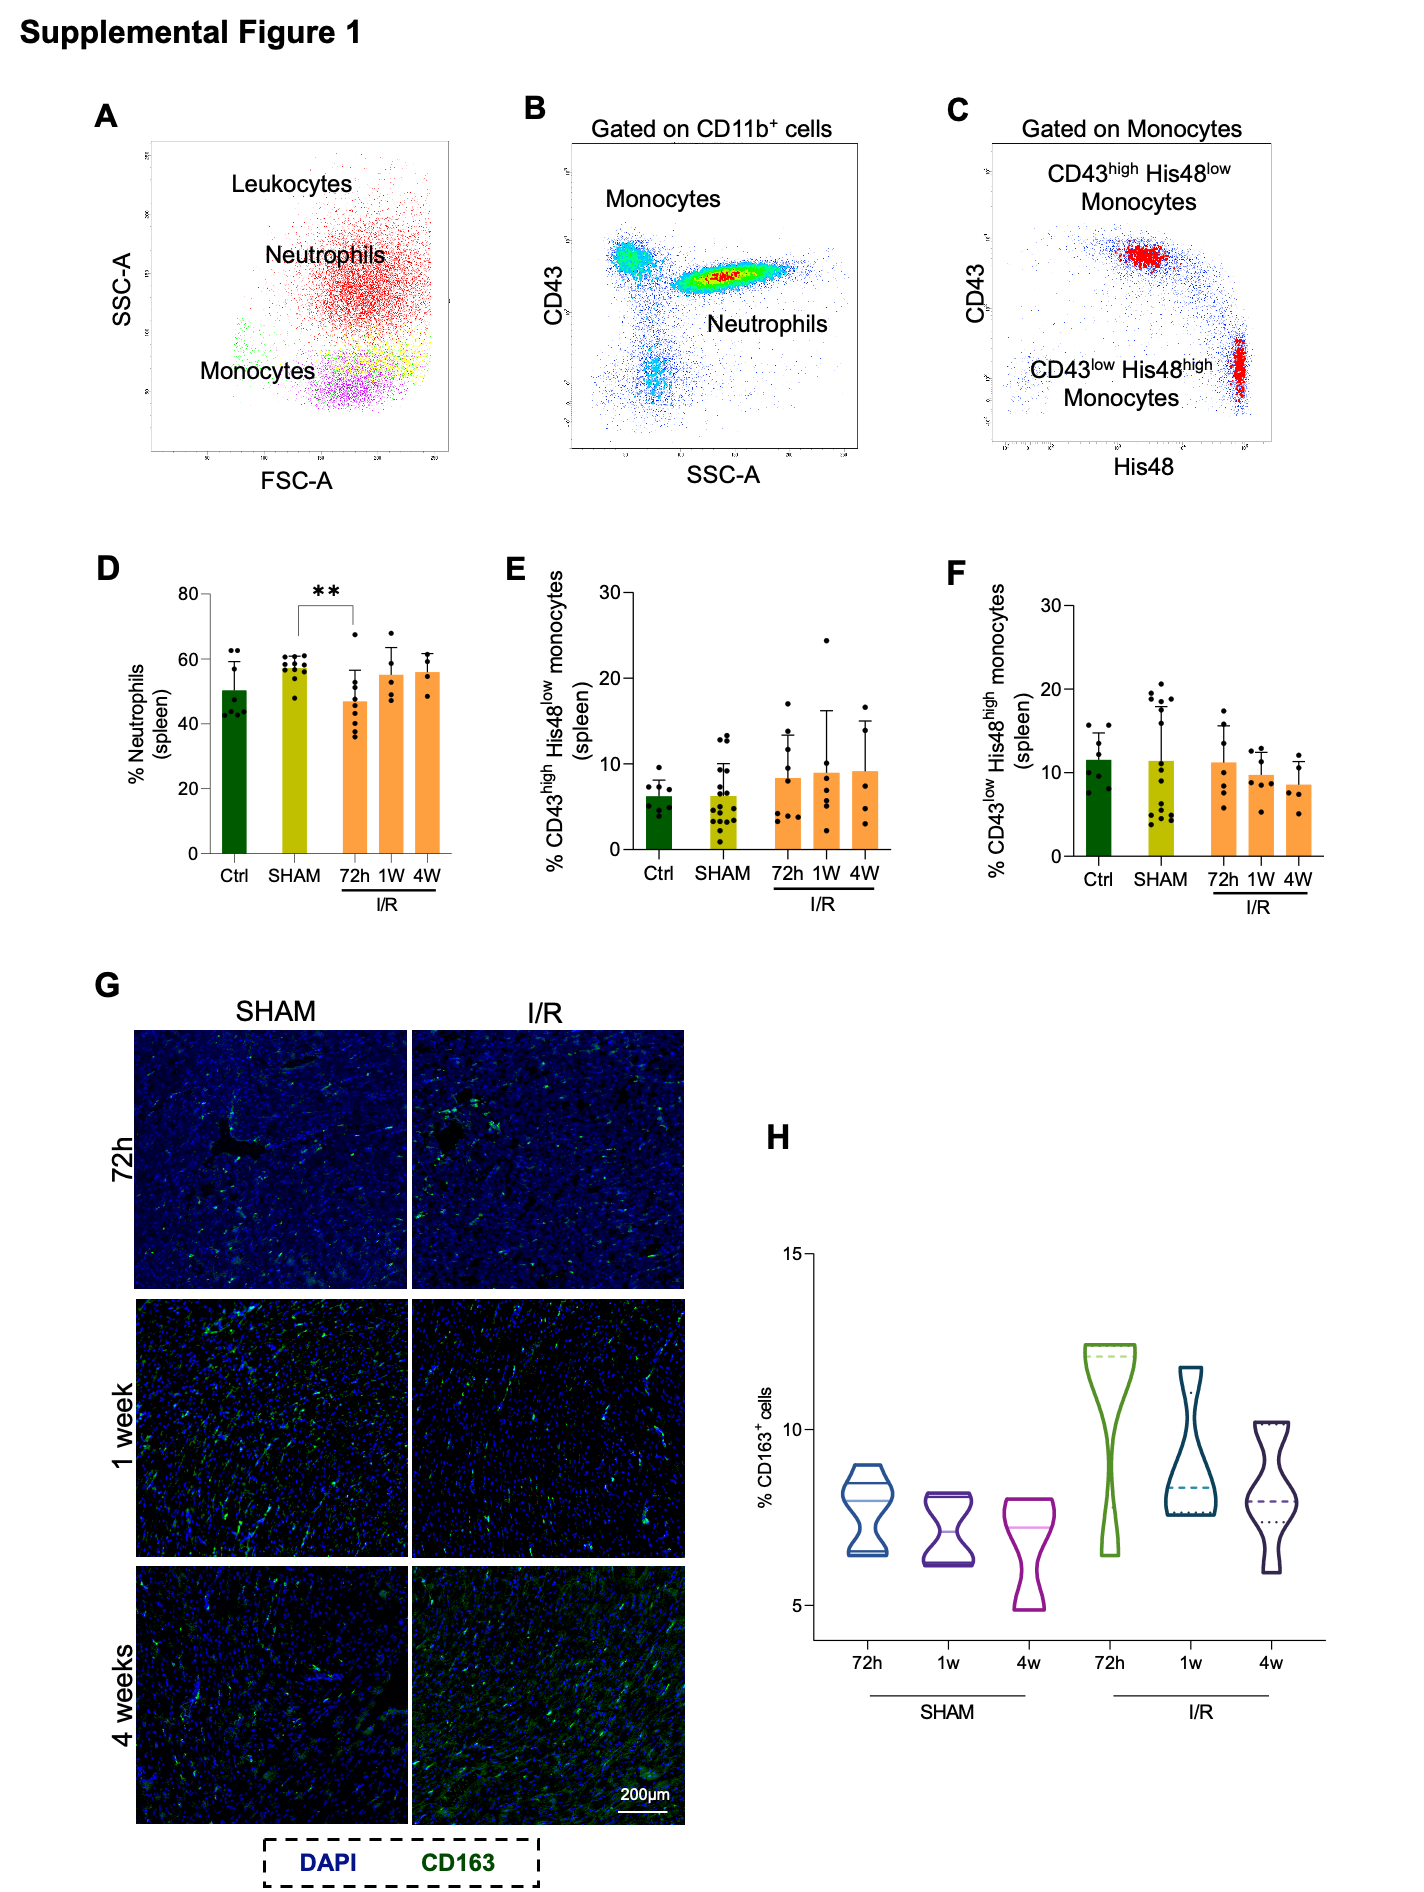


**Supplemental Figure 1. Inflammatory cell subsets in spleen and myocardium in rats after I/R intervention.** Dot plots with the flow cytometry strategy (**A-C**). Leukocytes gated on SSC and FSC, neutrophils (in red) and monocytes (in purple) (**A**). Monocytes and neutrophils gated in CD11b+ cells (**B**). CD43high His48low and CD43low His48high subtypes gated on monocytes (**C**). Bar graphs show levels of neutrophils (**D**), CD43high His48low (**E**) and CD43low His48high (**F**) monocytes in the spleen from control (dark green, n=9-11), SHAM (blue, n=4-10) and I/R (orange, n=5-10) rats at 72h, 1 and 4 weeks after the interventions. Immunofluorescence staining of CD163+ macrophages in SHAM and I/R rats (**G**) and CD163+ cell percentage (**H**) in the middle papillary region of hearts of SHAM (n=3-14) and I/R (n=5-16) rats at 72h, 1 and 4 weeks after the intervention. Nuclei are stained with DAPI (blue). Data are represented as mean ± S.D. ** indicate significance at p < 0.01. Group comparisons were performed using Kruskal-Wallis test with multiple comparisons for D-E graphs, and ordinary one-way ANOVA with multiple comparisons for C and H graphs. I/R: ischemia and reperfusion.

**
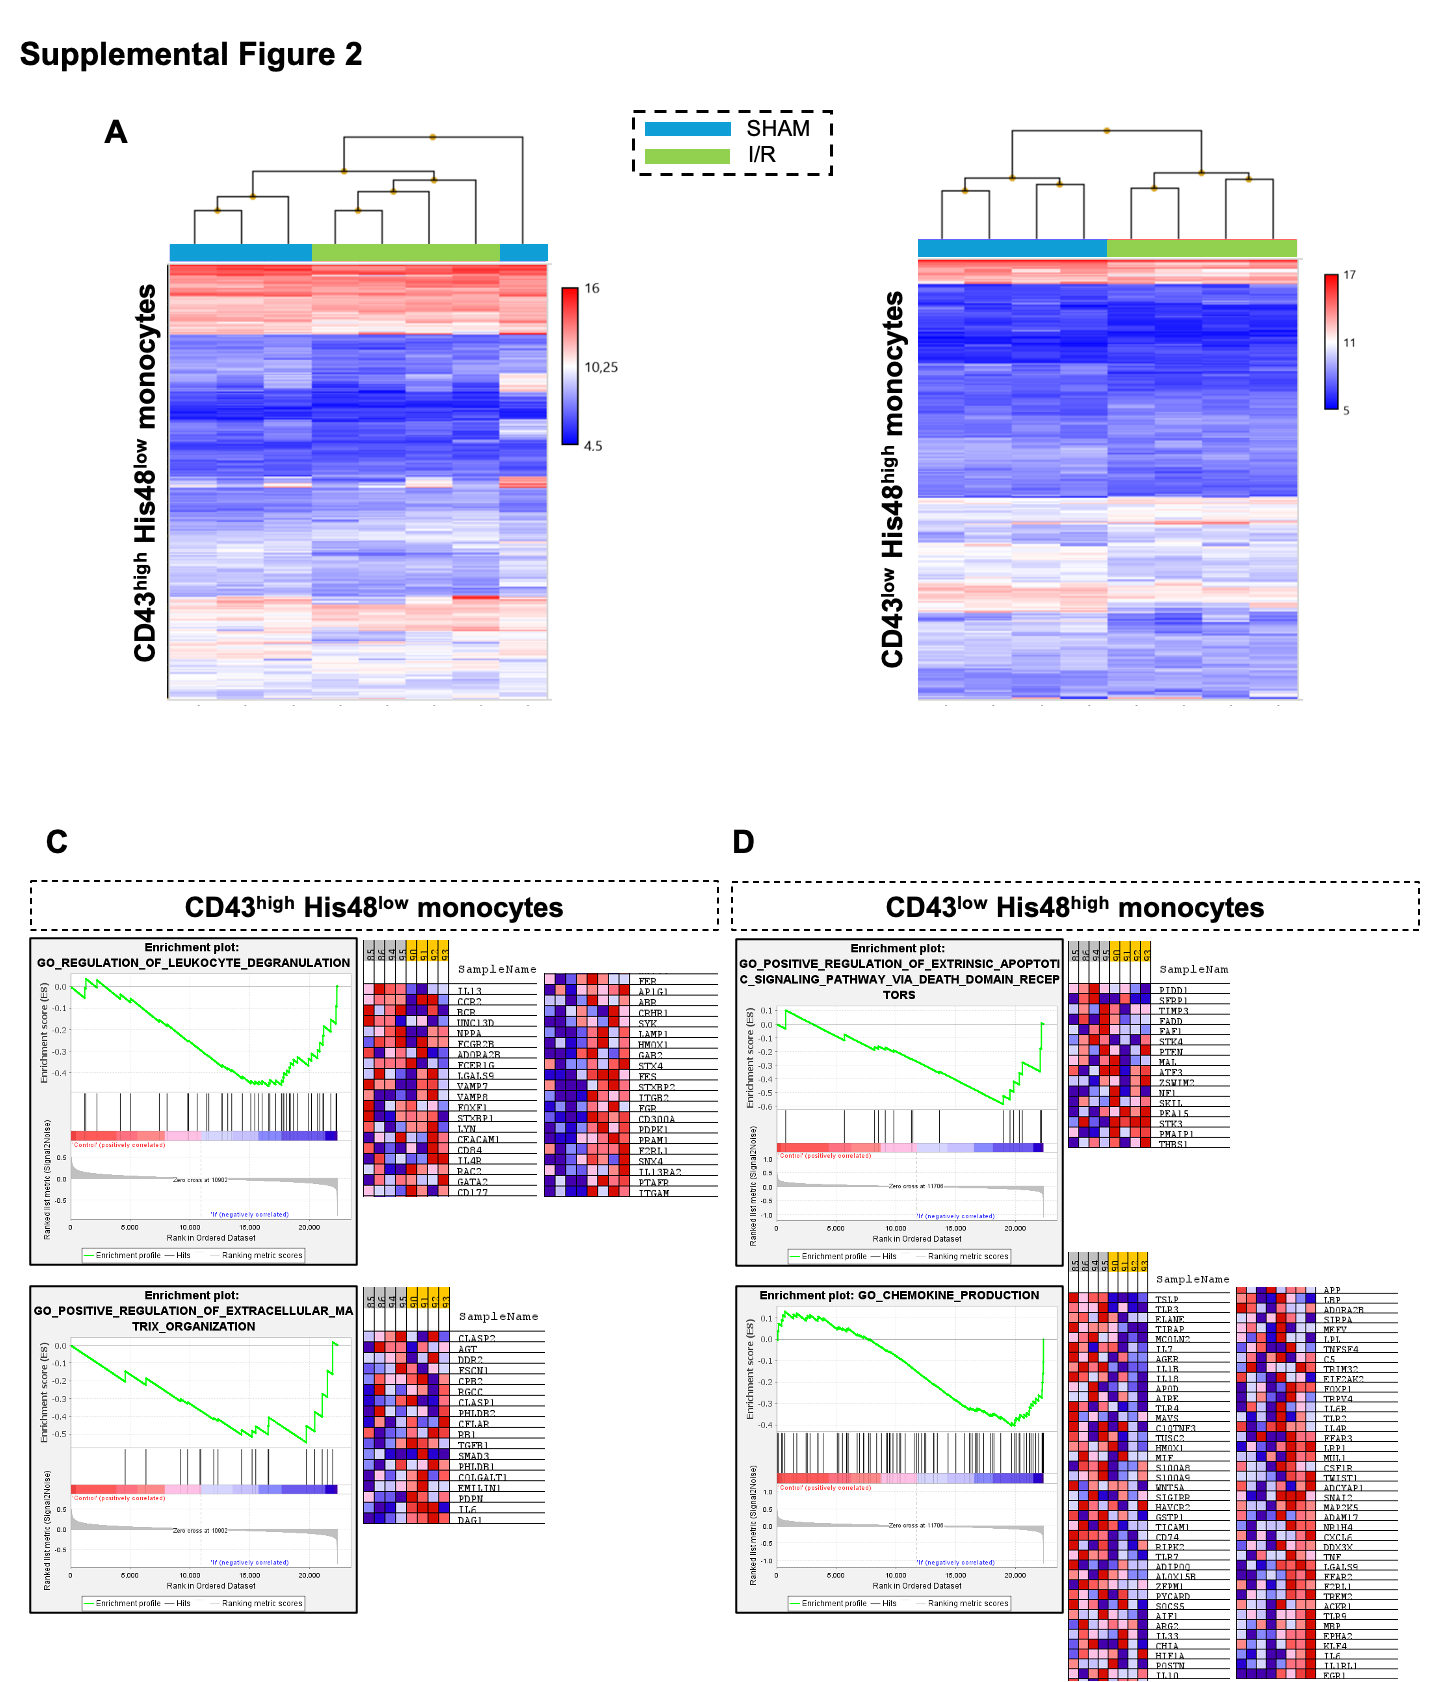
**

**Supplemental Figure 2. Gene Array and gene enrichment analysis of sorted monocytes in SHAM and I/R rats.** Hierarchical clustered sample heat-map plots of –2.0 > fold change > 2.0 value of genes (**A**) in CD43high His48low (left side) and CD43low His48high (right side) monocytes from SHAM (blue, n=4) and I/R (green, n=4) rats 24h after the intervention. Examples of enrichment analysis in CD43high His48low **(C)** and CD43low His48high (**D**) monocytes. I/R: ischemia and reperfusion.

**
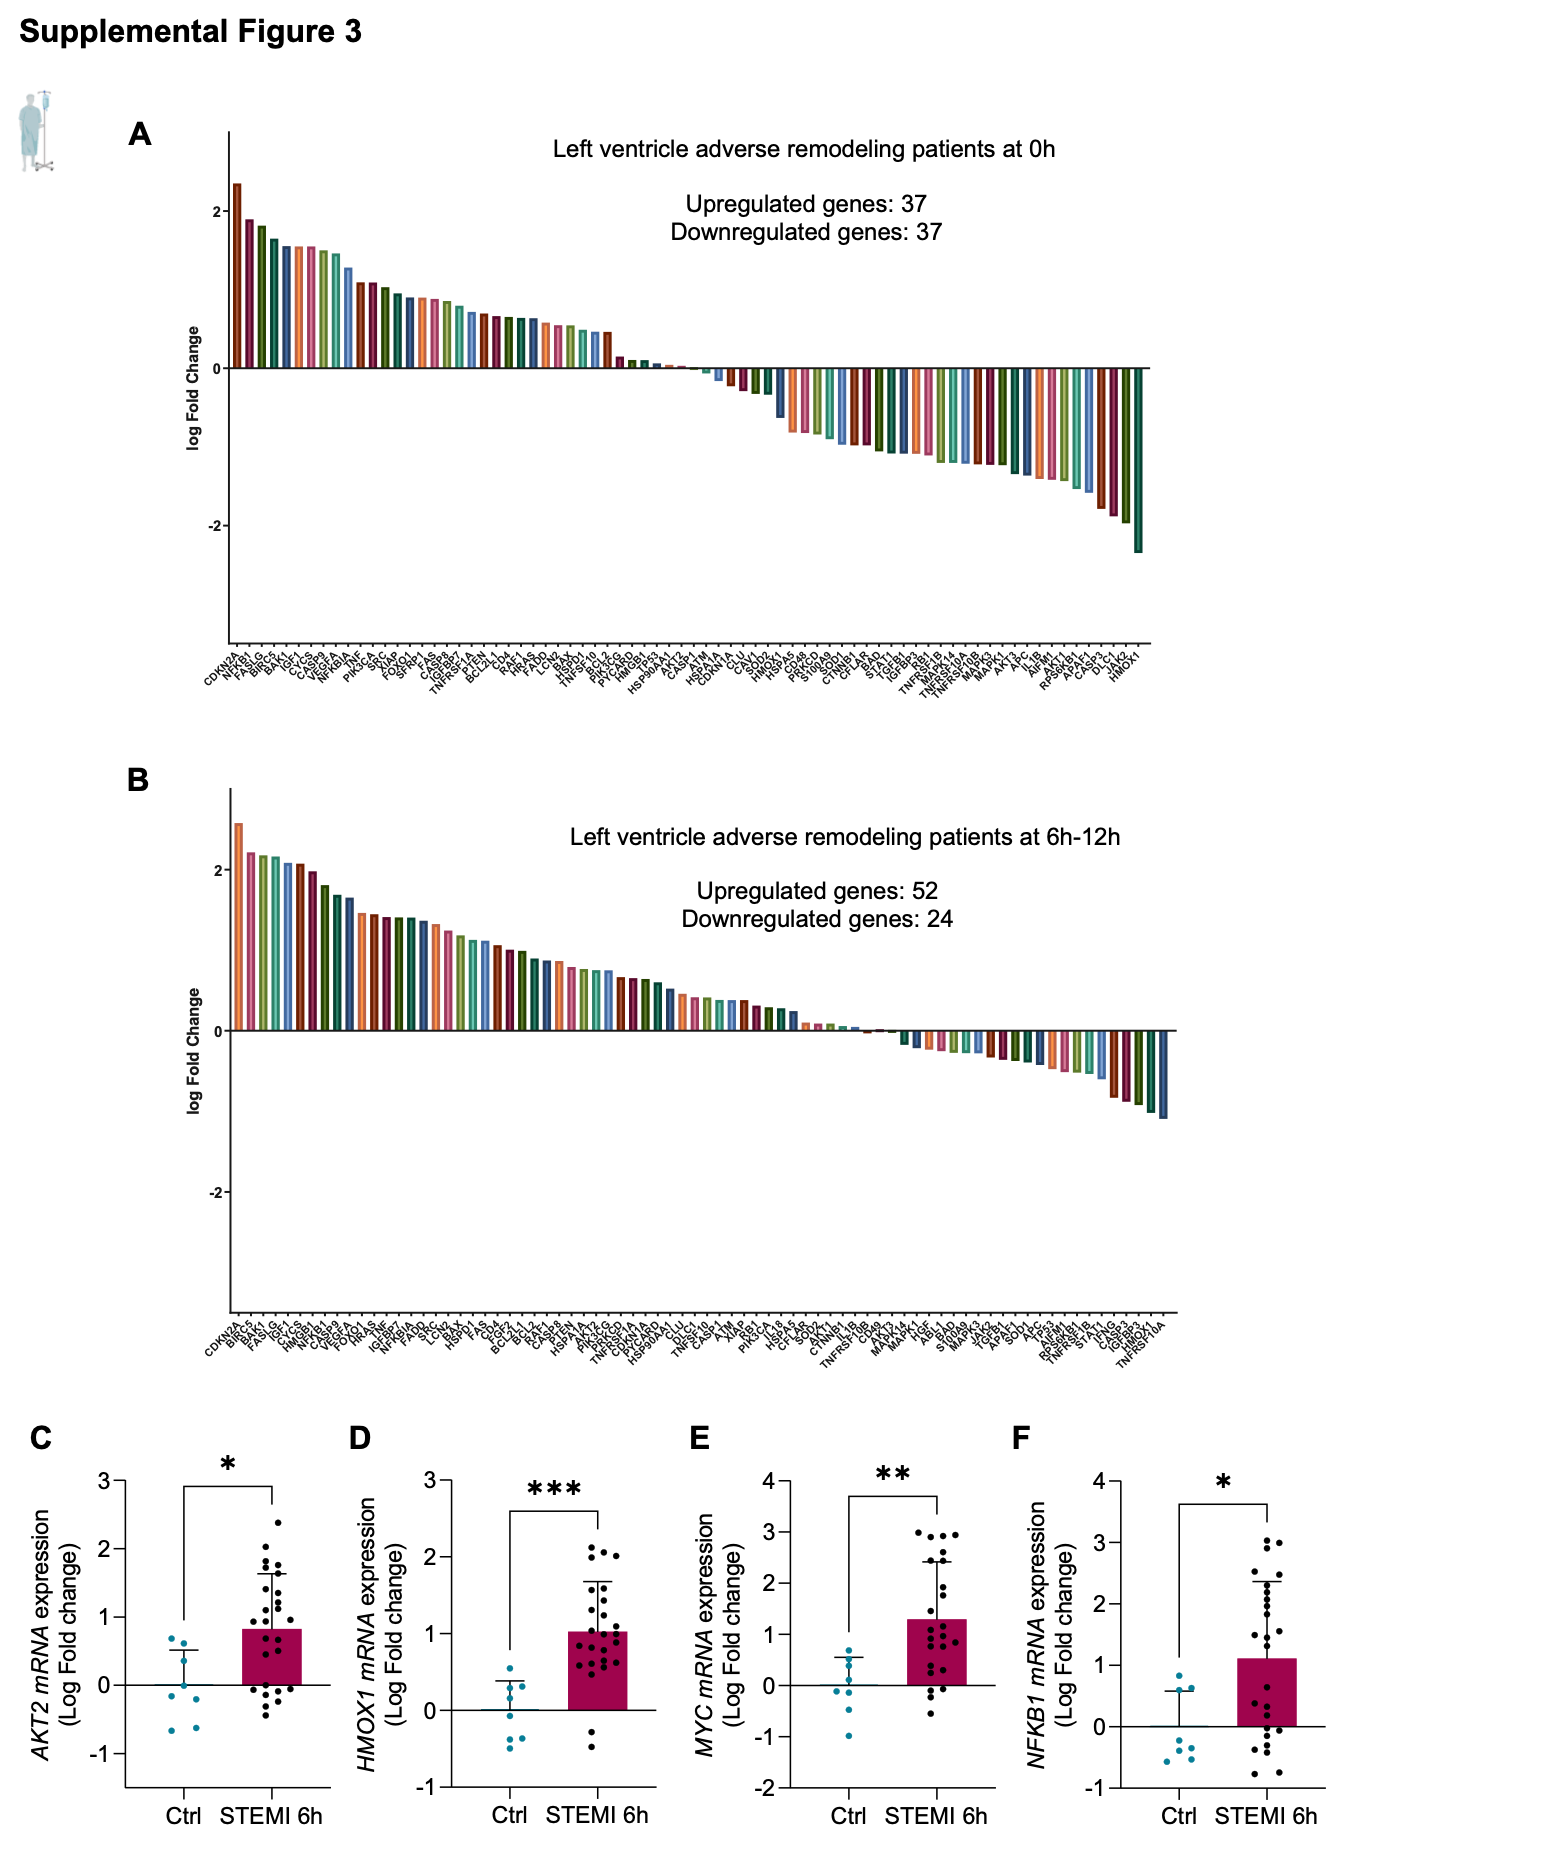
**

**Supplemental Figure 3. Fibrotic and apoptotic genes in STEMI patients.** Upregulated and downregulated genes from Prime PCR, in left ventricle adverse remodeling patients after STEMI at 0h (before revascularization, n=4) (**A**) and 6-12h (after revascularization, n=4) (**B**). Data are normalized to healthy controls (n=4). Gene expression (*AKT2*, **C**; *HMOX1*, **D**; *MYC*, **E**; *NFKB1*, **F**) in healthy controls (n=8) and STEMI patients (n= 25) 6h after revascularization. Gene's relative expression was calculated using the 2−ΔΔCt method after normalization to the internal control 18S. Data are relative expression of mean of fold change ± S.D. (*), (**) and (***) indicate significance at p < 0.05, p < 0.01 and p<0.001 respectively. Differences between two groups were assessed using the unpaired t-test for C- E graphs, and Mann-Whitney test for F graph. STEMI: ST-elevation myocardial infarction. AKT2: AKT serine/threonine kinase 2. HMOX1: Heme oxygenase 1. MYC: myc proto-oncogen, BHLH transcription factor. NFKB1: Nuclear factor Kappa B subunit 1.

**
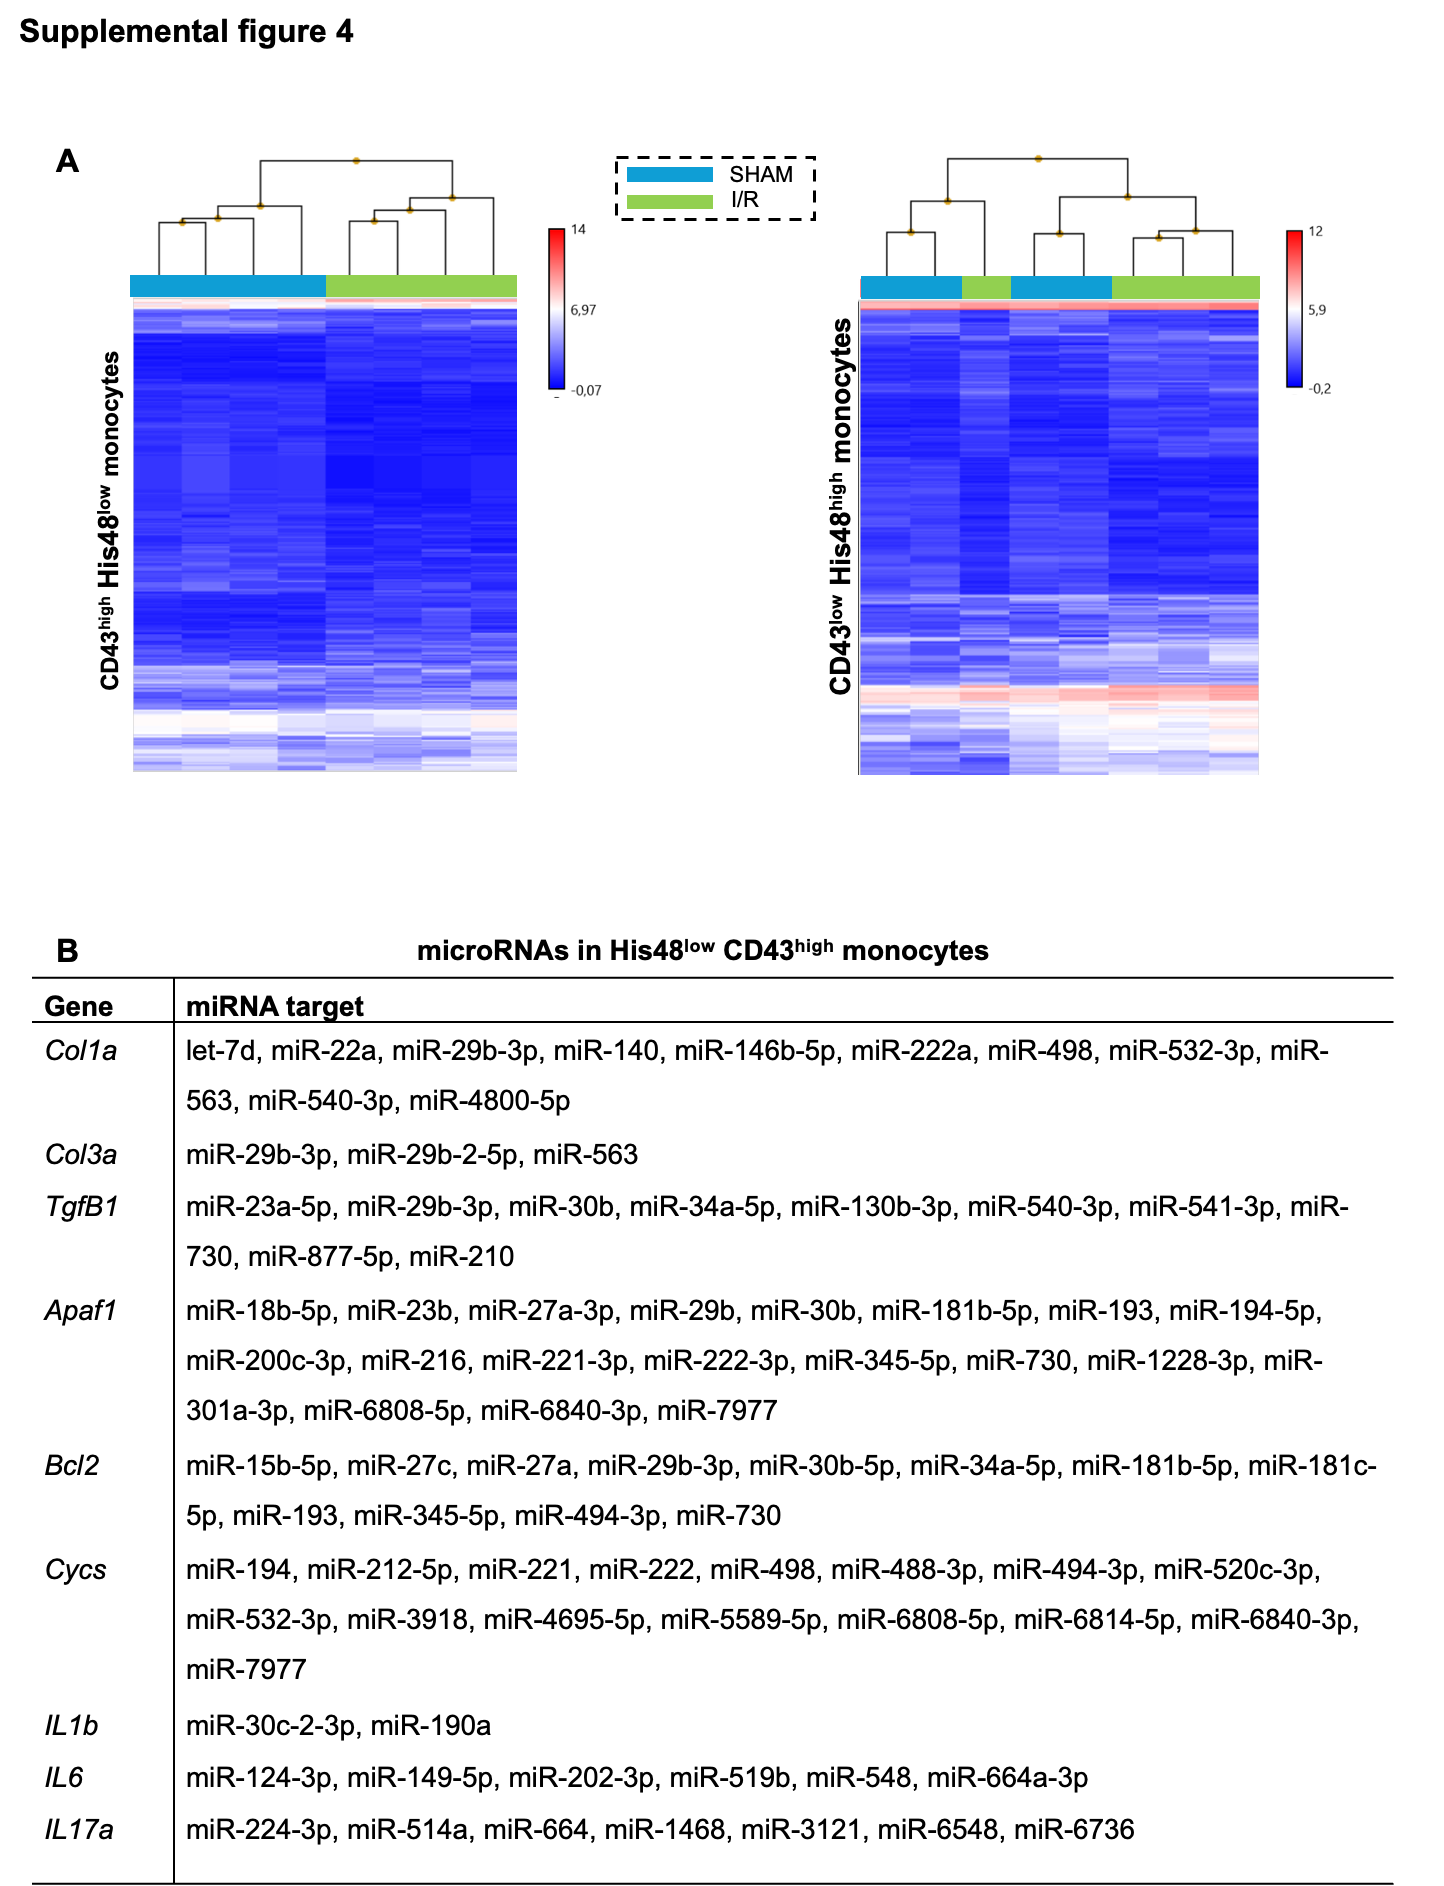
**

**Supplemental Figure 4. microRNAs hierarchical clusters in sorted monocytes and their regulated genes in SHAM and I/R rats.** Hierarchical clustered sample heat-map plots of –2.0 > fold change > 2.0 value of genes (**A**) in CD43high His48low (left side) and CD43low His48high (right side) monocytes from SHAM (blue, n=4) and I/R (green, n=4) 24h after the I/R intervention. (**B**) In silico study of microRNAs in CD43low His48high monocytes, regulating apoptotic and fibrotic genes studied in the cardiac populations. I/R: ischemia and reperfusion. *Col1a*: collagen type 1a; *Col3a*: collagen type 3a; *Tgfb1*: transforming growth factor beta 1; *Apaf1*: apoptotic protease activating factor-1; *Bcl2*: B-cell lymphoma 2; *Cycs*: cytochrome c somatic; *IL1b*: interleukin 1 beta; *IL6*:interleukin 6; *IL17a*: interleukin 17a; miR: microRNA.

**
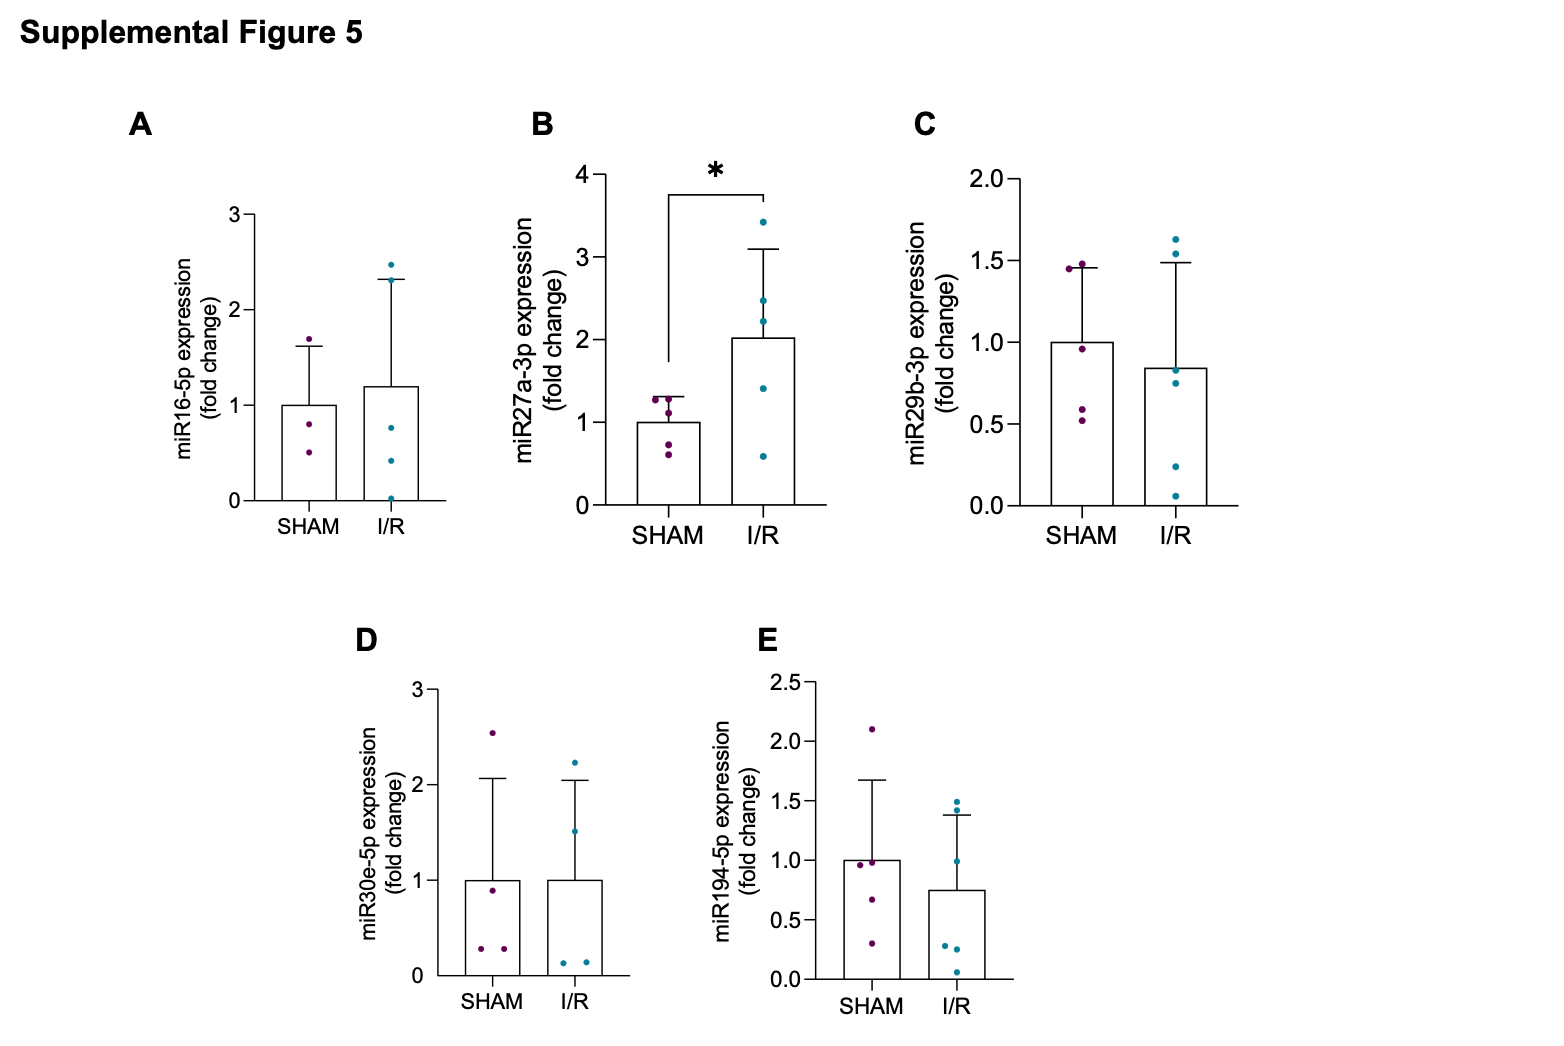
**

**Supplemental Figure 5. microRNAs validation in sorted CD43low His48high monocytes.** MicroRNAs validation of miR-16-5p (**A**), miR-27a-3p (**B),** miR-29b-3p (**C),** miR-30e-5p (**F**), miR-194-5p (**D)** and miR-194-5p (**E**) by RT-qPCR in CD43low His48high monocytes of SHAM (purple dots, n=4-5) and I/R (blue dots, n= 4-5) rats 24h after the I/R intervention. miRNA's relative expression was calculated using the 2−ΔΔCt method after normalization to the internal control U6. Data are relative expression of mean of fold change ± S.D. (*) indicate significance at p < 0.05. Differences between two groups were assessed using the unpaired t-test. I/R: ischemia and reperfusion; miR: microRNA.

**
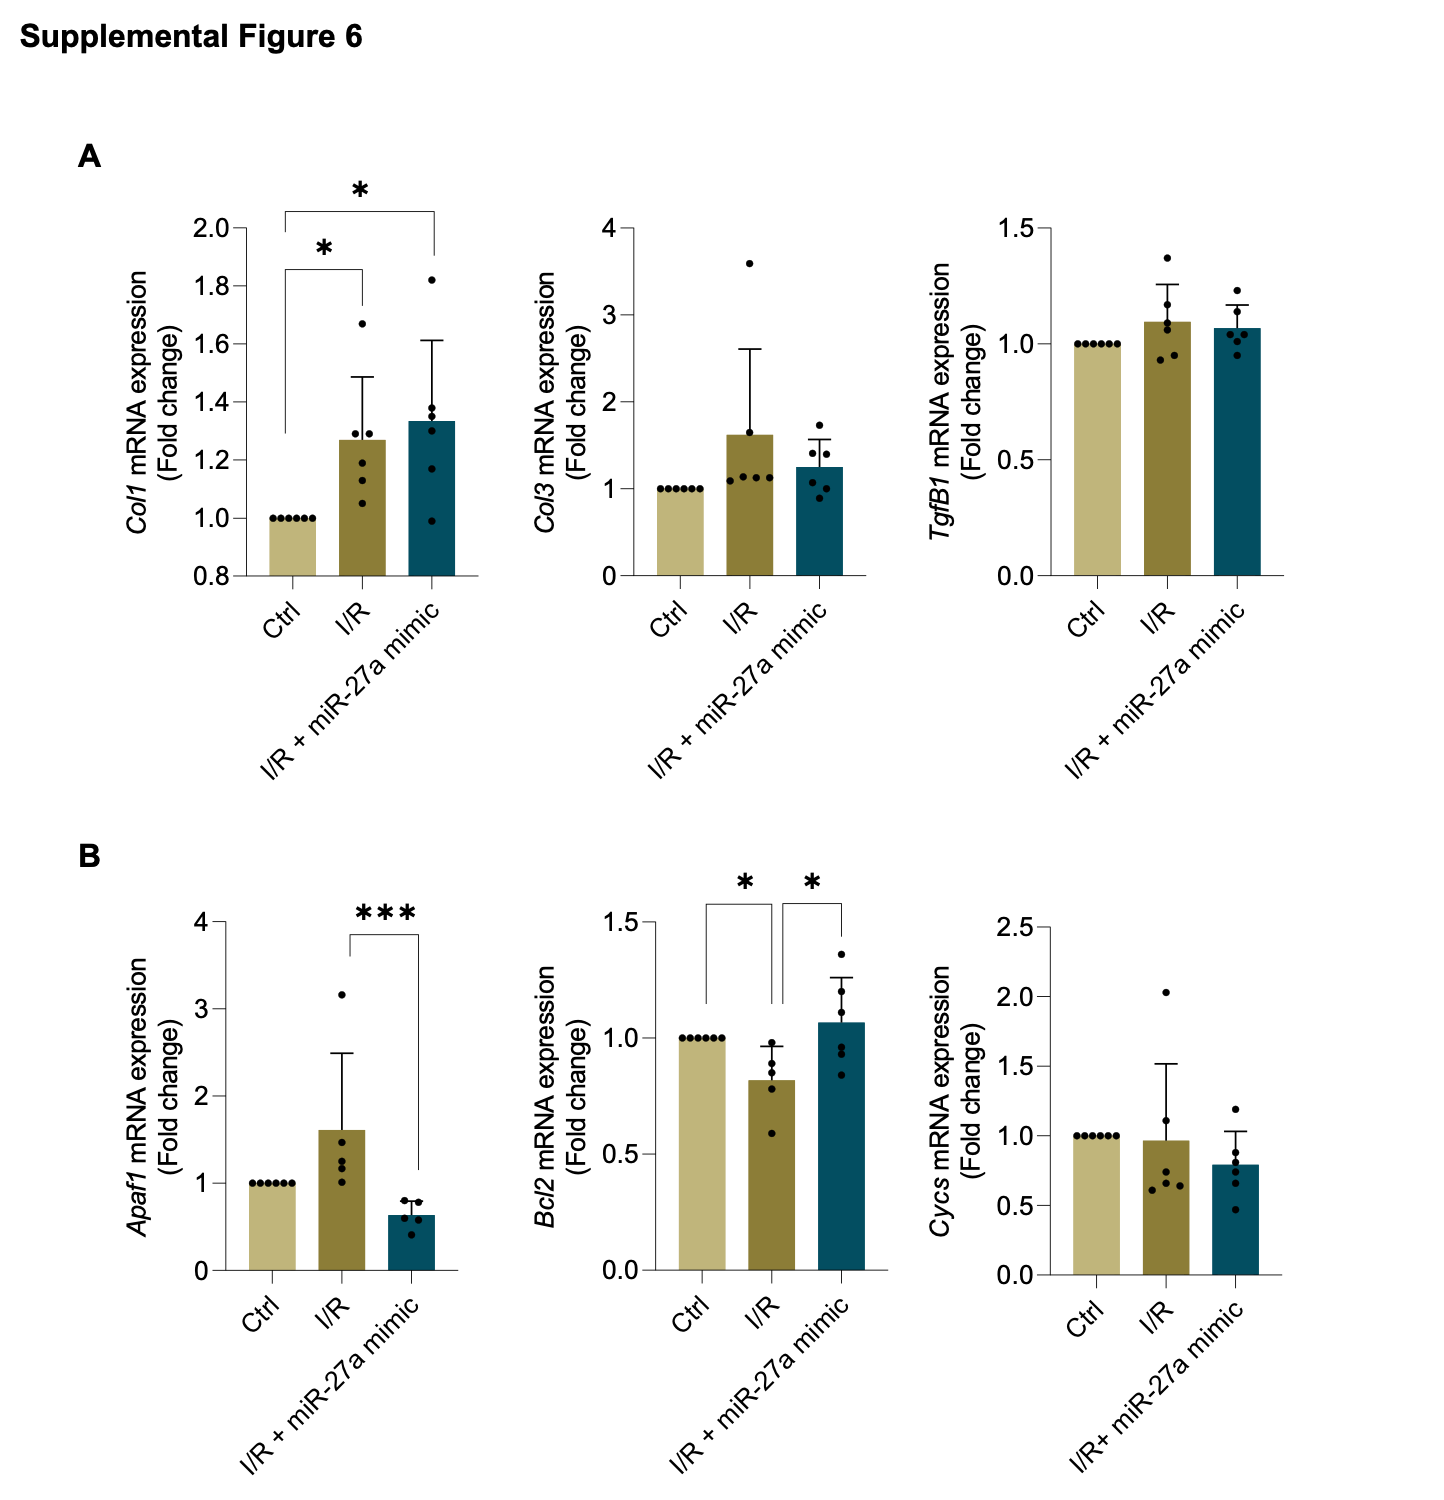
**

**Supplemental Figure 6. miR-27a mimic regulation of fibrotic and apoptotic genes in cardiomyocytes of rats.** Quantification of mRNA expression of fibrotic (*Col1*, *Col3*, *Tgfb1*) (**A**) and apoptotic genes (*Cycs*, *Apaf1*, *Bcl2)* (**B**) by RT-qPCR in NRVMs (n=6) when transfected with scramble (light beige for controls and dark beige for I/R) and miR-27a mimic (dark blue for I/R). Gene's relative expression was calculated using the 2−ΔΔCt method after normalization to the internal control 18S. Data are relative expression of mean of fold change ± S.D. (*) and (***) indicate significance at p < 0.05 and p < 0.001, respectively. Group comparisons were performed using ordinary one-way ANOVA with multiple comparisons for *Col1, Tgfb1* and *Bcl2* graphs, and Kruskal-Wallis test with multiple comparisons for *Col3, Apaf1* and *Cycs* graphs. *Col1*: collagen type 1; *Col3*: collagen type 3A; *Tgfb1*: transforming growth factor beta 1; *Apaf1*: apoptotic protease activating factor-1; *Bcl2*: B-cell lymphoma 2; *Cycs*: cytochrome c somatic; miR: microRNA. I/R: ischemia and reperfusion; miR: microRNA.

**Supplemental Material.**

**Prime PCR**

**Supplemental Table 1. List of genes in Apoptosis and inflammation Prime PCR.**

| ABL1 | FASLG | PIK3CG |
| --- | --- | --- |
| AIFM1 | FGF2 | PRKCD |
| AKT1 | FGFR2 | PTEN |
| AKT2 | FOXO1 | PYCARD |
| AKT3 | HGF | RAF1 |
| APAF1 | HMGB1 | RB1 |
| APC | HMOX1 | RPS6KB1 |
| ATM | HRAS | S100A9 |
| BAD | HSP90AA1 | SFRP1 |
| BAK1 | HSPA1A | SOD1 |
| BAX | HSPA5 | SOD2 |
| BCL2 | HSPD1 | SRC |
| BCL2L1 | IFNG | STAT1 |
| BIRC5 | IGF1 | TGFB1 |
| CASP1 | IGFBP3 | TNF |
| CASP3 | IGFBP7 | TNFRSF10A |
| CASP8 | IL17A | TNFRSF10B |
| CASP9 | IL18 | TNFRSF1A |
| CAV1 | IL1B | TNFRSF1B |
| CD4 | JAK2 | TNFSF10 |
| CD44 | LCN2 | TP53 |
| CDKN1A | MAPK1 | TP63 |
| CDKN2A | MAPK14 | VEGFA |
| CFLAR | MAPK3 | XIAP |
| CLU | MAPK8 | TBP |
| CTNNB1 | MCL1 | GAPDH |
| CYCS | MDM2 | HPRT1 |
| DLC1 | MYC | gDNA |
| ERBB3 | NFKB1 | PCR |
| ERBB4 | NFKBIA | RQ1 |
| FADD | NGF | RQ2 |
| FAS | PIK3CA | RT |

| Human AKT2 Forward | CATCCTCATGGAAGAGATCCGC |
| --- | --- |
| Human AKT2 Reverse | GAGGAAGAACCTGTGCTCCATG |
| Human HMOX1 Forward | CCAGGCAGAGAATGCTGAGTTC |
| Human HMOX1 Reverse | AAGACTGGGCTCTCCTTGTTGC |
| Human MYC Forward | TCAAGAGGCGAACACCAAC |
| Human MYC Reverse | GGCCTTTTCATTGTTTTCCA |
| Human NFKB1 Forward | GCAGCACTACTTCTTGACCACC |
| Human NFKB1 Reverse | TCTGCTCCTGAGCATTGACGTC |
| Rat Col1 Forward | TTCACCTACAGCACGCTTGT |
| Rat Col1 Reverse | TTTGGGATGGAGGGAGTTTAC |
| Rat Col3 Forward | GGTCACTTTCACTGGTTGACGA |
| Rat Col3 Reverse | TTGAATATCAAACACGCAAGGC |
| RatTgfb1 Forward | ATTCCTGGCGTTACCTTGG |
| Rat Tgfb1 Reverse | AGCCCTGTATTCCGTCTCCT |
| Rat Apaf1 Forward | TCCAGCGGCAAGGACACAGACG |
| Rat Apaf1 Reverse | CAACCGCGTGCAAAGATTCTGCA |
| Rat Bcl2 Forward | TTCGGGATGGAGTAAACTGG |
| Rat Bcl2 Reverse | AAGGCTCTAGGTGGTCATTCAG |
| Rat Cycs Forward | CAAAAGTGTGCCCAGTGCCA |
| Rat Cycs Reverse | CAGCAGCCTGGCCTGTCTTC |
| 18S Forward | AACGAGACTCTGGCATGCTAA |
| 18S Reverse | GCCACTTGTCCCTCTAAGAAGT |

**Supplemental Table 2. List of forward and reverse primers.**
